# Supplementary material
Source: ML conference proceedings conference paper supplement (https://proceedings.neurips.cc/paper_files/paper/2019/hash/faefec47428cf9a2f0875ba9c2042a81-Abstract.html)
Supplement: Supplementary file [file faefec47428cf9a2f0875ba9c2042a81-Supplemental.zip]

---

# KNG: The K-Norm Gradient Mechanism:

## Supplementary Materials

---

**Matthew Reimherr**  
 Department of Statistics  
 Pennsylvania State University  
 State College, PA 16802  
 mreimherr@psu.edu

**Jordan Awan**  
 Department of Statistics  
 Pennsylvania State University  
 State College, PA 16802  
 awan@psu.edu

### 1 Proofs

*Proof of Theorem 3.2.* For notational simplicity, we assume that the base measure,  $\mu$ , is Lebesgue. The density of the KNG mechanism can then be expressed as

$$f_n(\theta) = c_n^{-1} \exp \left\{ \frac{-\epsilon}{2\Delta(\hat{\theta} + z/n)} \|\nabla \ell_n(\theta)\|_K \right\},$$

where  $c_n$  is the normalizing constant. Define the random variable  $Z = n(\tilde{\theta} - \hat{\theta})$ , then its density is given by

$$f_n(z) = c_n^{-1} n^{-1} \exp \left\{ \frac{-\epsilon}{2\Delta(\hat{\theta} + z/n)} \|\nabla \ell_n(\hat{\theta} + z/n)\|_K \right\}.$$

Using a one term Taylor expansion, we have by Assumption (2) and (3) that

$$\begin{aligned} \nabla \ell_n(\hat{\theta} + z/n) &= \nabla \ell_n(\hat{\theta}) + \mathbf{H}_n(\hat{\theta})z/n + o_p(1) \\ &= \mathbf{H}_n(\hat{\theta})z/n + o_p(1), \end{aligned}$$

where  $\mathbf{H}_n(\theta)$  is the Hessian matrix of  $\ell_n$  evaluated at  $\theta$ . Recall that

$$c_n n = \int \exp \left\{ \frac{\epsilon}{2\Delta(\hat{\theta} + z/n)} \left( -\|\nabla \ell_n(\hat{\theta} + z/n)\|_K \right) \right\} dz.$$

By Assumption (1),  $\ell_n$  is strongly convex and thus

$$\frac{1}{\Delta(\hat{\theta} + z/n)} \left\langle \nabla \ell_n(\hat{\theta} + z/n) - \nabla \ell_n(\hat{\theta}), z/n \right\rangle \geq \frac{n\alpha}{\Delta} \|z/n\|_2^2.$$

Combining the Cauchy-Schwartz inequality with the fact that  $\nabla \ell_n(\hat{\theta}) = 0$  implies

$$\frac{1}{\Delta(\hat{\theta} + z/n)} \|\nabla \ell_n(\hat{\theta} + z/n)\|_2 \geq \frac{n\alpha}{\Delta} \|z/n\|_2.$$

By the equivalence of norms on  $\mathbb{R}^d$ , we have that

$$\frac{-1}{\Delta(\hat{\theta} + z/n)} \|\nabla \ell_n(\hat{\theta} + z/n)\|_K \leq \frac{-C\alpha}{\Delta} \|z\|_2,$$

for some constant  $C$ . Since  $\exp\{-\|z\|_2\}$  is integrable, we can apply the dominated convergence theorem to conclude that the constants converge to a nonzero and finite quantity. Since  $\Delta(\theta)$  is

continuous in  $\theta$ , we also have that  $\Delta(\hat{\theta} + z/n) \rightarrow \Delta(\theta^*)$ . Putting everything together, we can conclude that

$$f_n(z) \rightarrow f(z) \propto \exp \left\{ \frac{-\epsilon}{2\Delta(\theta^*)} \|\Sigma^{-1}z\|_K \right\},$$

which is the density of the  $K$ -norm mechanism. Applying Scheffe's Theorem, we thus have both convergence in distribution as well as convergence in total variation to a  $K$ -norm mechanism  $\square$

## 2 Linear Regression

### 2.1 Exponential Mechanism

Our objective function is  $\ell(\theta; D) = \sum_{i=1}^n (y_i - x_i^\top \theta)^2$ . For the exponential mechanism, we need to bound the sensitivity of  $\ell(\theta)$ :

$$\begin{aligned} |\ell_n(\theta; D) - \ell_n(\theta; D')| &= |(y_1 - x_1^\top \theta)^2 - (y_2 - x_2^\top \theta)^2| \\ &\leq \sup_{y_1, x_1, \theta} (y_1 - x_1^\top \theta)^2 \\ &\leq \sup_{x_1, \theta} (1 + |x_1^\top \theta|)^2 \\ &\leq \sup_{\theta} (1 + \|\theta\|_1)^2 \\ &= (1 + B)^2, \end{aligned}$$

where we used the assumptions that  $\|x_1\|_\infty \leq 1$ ,  $|y_1| \leq 1$ , and  $\|\theta^*\|_1 \leq B$ . The exponential mechanism with objective function  $\ell(\theta)$  draws  $\theta$  from

$$f_n(\theta) \propto \exp \left( \frac{-\epsilon}{2(1+B)^2} \sum_{i=1}^n (y_i - x_i^\top \theta)^2 \right),$$

with respect to the uniform measure on  $\{\theta \mid \|\theta\|_1 \leq B\}$ .

### 2.2 Objective Perturbation

For objective perturbation, we use the version stated in Awan and Slavković [2018], which allows us to use the same bound on the gradient as developed in subsection 4.2. Objective perturbation also requires a bound on the eigenvalues of the hessian for one datapoint:

$$\begin{aligned} \max \text{eigenvalue}(2x_1 x_1^\top) &\leq \text{trace}(2x_1 x_1^\top) \\ &= 2 \text{trace}(x_1^\top x_1) \\ &\leq 2 \sum_{j=1}^d |x_{1j}|^2 \\ &\leq 2d. \end{aligned}$$

Objective perturbation then draws a random vector  $b$  from the density  $f(b) \propto \exp \left( -\frac{\epsilon}{8(1+B)} \|b\|_\infty \right)$  (a simple sampling algorithm for  $f(b)$  is stated in Awan and Slavković [2018]), and then finds the optimum of the modified objective:

$$\arg \min_{\|\theta\|_1 \leq 1} \ell_n(\theta; D) + \frac{\gamma}{2} \theta^\top \theta + \theta^\top b,$$

where  $\gamma = \frac{2d}{\exp(\epsilon/2) - 1}$ . Since  $\ell$  is convex, this new objective is also convex. We restrict the search space of  $\theta$  to  $\{\theta \mid \|\theta\|_1 \leq B\}$ , since we assume that  $\|\theta^*\| \leq B$  for our bounds.

### 3 Quantile Regression

#### 3.1 Exponential Mechanism

Our objective function is  $\ell_n(\theta; D) = \sum_{i=1}^n \rho_\tau(y_i - x_i^\top \theta)$ . For the exponential mechanism we need to assume additional bounds on the data as well as on  $\theta^*$ . As in the linear regression case, we assume that  $-1 \leq y_i \leq 1$ ,  $-1 \leq x_i \leq 1$ , and  $\|\theta\|_1 \leq B$ . We bound the sensitivity of  $\ell_n$  as

$$\begin{aligned} |\ell_n(\theta; D) - \ell_n(\theta; D')| &\leq 2 |\ell_n(\theta; D)| \\ &\leq \sup_{y_1, x_1, \theta} 2 \max\{\tau, 1 - \tau\} |y_1 - x_1^\top \theta| \\ &\leq 2 \max\{\tau, 1 - \tau\} (1 + B). \end{aligned}$$

The exponential mechanism then samples from the density

$$f_n(\theta) \propto \exp \left\{ \frac{-\epsilon}{4 \max\{\tau, 1 - \tau\} (1 + B)} \ell_n(\theta; D) \right\}.$$

#### References

Jordan Awan and Aleksandra Slavković. Structure and sensitivity in differential privacy: Comparing  $k$ -norm mechanisms. *ArXiv e-prints*, January 2018. Under Review.
